# Supplementary material for: Waterborne Diseases and Water Resource Management in Bihar: Analysing Relationships through an Eco-social Systems Approach
Source: Research Square preprint supplement (doi:10.21203/rs.3.rs-6213904/v1), 2025-05-20
Supplement: Supplementary file 1 [file 6b5d6984dcde935b8853ac4e.docx]

| Schedule No. |  | **Interview Schedule[[1]](#endnote-1)** | Interview Date |  |
| --- | --- | --- | --- | --- |
| Informant category[[2]](#endnote-2) |  | Time spend |  |

| **[A] respondent details** | | | |
| --- | --- | --- | --- |
| 1. name |  | 5. designation |  |
| 2. gender |  | 6. occupation |  |
| 3. age: |  | 7. highest education |  |
| 4. marital status |  | 8. contact details |  |
| 9. Have you any experience of working on water, health, eco-hydro sensitivity? |  | 10. please explain *(if yes in previous question)* |  |

| **[B] scheduled questions** | |
| --- | --- |
| s.n. | questions |
| ***for informant categories 1, 2 and 3 as mention in endnote*** | |
| 1 | What are the current sources of water in village? *(follow the sand watch model [Fig.1)* |
| 2 | What are the sources of water earlier in village? *(follow the sand watch model [Fig.1)* |
| 3 | What were the sources of water long back at the time your grandfather? *(follow the sand watch model [Fig.1])* |
| 4 | How the sources of water changes over time? *(follow the sand watch model [Fig.1])* |
| 5 | What has been the impact on health in general and household members (female)? |
| 6 | What do think about water issues in Gaya/Vaishali? |
| 7 | How government is managing the water resources in Gaya/Vaishali? |
| 8 | What are the general irrigation systems in Gaya or Vaishali? |
| 9 | There are traditional water resource management/irrigation systems in Gay,, how is it working? |
| 10 | Any water systems in the village that were used traditionally and have now been lost/destroyed? |
| 11 | What are the issue emerges due to water contamination? |
| 12 | There are arsenic issues in Vaisali, what are social and health implication? |
| 13 | How people and government are reacting or acting for the arsenic issues? |
| 14 | How the Swachh Bharat Mission has received and working in the village? |
| ***for informant categories 4,5,6,7,8 and 9 as mention in endnote*** | |
| 15 | What is your understanding about water issues in Bihar? |
| 16 | What are the reasons of the water issues in Bihar as there are geographies where abundant of water, however there are parts in droungt? |
| 17 | What is your take on water policy and schemes in Bihar? |
| 18 | How is the new water program ‘Jal Jeevan Hariyali’ is receiving? |
| 19 | Any changes in health problems from the past? Any of them related to water? |
| 20 | How ecology is affecting water resources and health? |
| 21 | How is quality and quantity aspects of water is affecting? |
| 22 | How anthropogenic activities in Bihar is affecting water resources |

| **[B]** Additional questions if emerges during interview | |
| --- | --- |
| *s.n.* | *questions* |
| 1 |  |
| 2 |  |
| 3 |  |
| 4 |  |
| 5 |  |

**Figure: 1 Sand Watch Model to Trace Social History of Water**


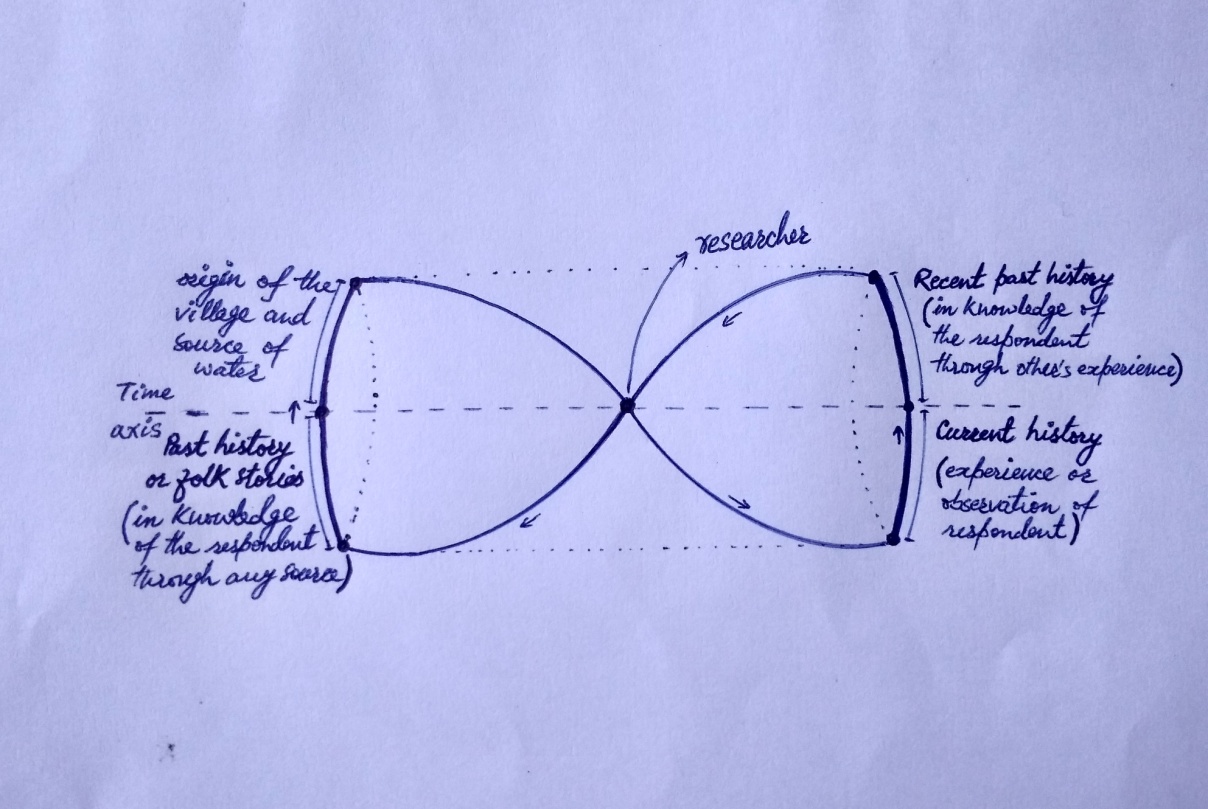


1. The interview schedule is semi-structure in nature. As per the flow of the interview, the researcher would probe the information. [↑](#endnote-ref-1)
2. Village head-1, designated person in the village-2, village sanitation and water committee members-3, officer at PHED-4, activist working on water and health-5, professional social worker-7, politicians-8, arsenic expert-9 [↑](#endnote-ref-2)
