# Supplementary material for: Waterborne Diseases and Water Resource Management in Bihar: Analysing Relationships through an Eco-social Systems Approach
Source: Research Square preprint supplement (doi:10.21203/rs.3.rs-6213904/v1), 2025-05-20
Supplement: Supplementary file 2 [file f07984284d515aff1676bfe4.docx]

**Household Survey**

Title of the Research

**Water Borne Diseases and Water Resource Management in Eco-hydro Sensitive Districts of Bihar**

Researcher

**Asrarul Haque Jeelani**

Ph.D. Candidate

Centre of Social Medicine and Community Health

Jawaharlal Nehru University, New Delhi

Supervisor

**Prof. Ritu Priya Mehrotra**

Professor

Centre of Social Medicine and Community Health

Jawaharlal Nehru University, New Delhi

**Statement of Consent and to Inform the Respondent**[[1]](#footnote-1)

I, Asrarul Haque Jeelani; a Ph.D. candidate of Centre of Social Medicine and Community Health, Jawaharlal Nehru University, New Delhi. I am doing research under Prof. Ritu Priya Mehrotra, professor from the same centre. The topic under my research is titled as ‘Water Borne Diseases and Water Resource Management in Eco-hydro Sensitive Districts of Bihar.’ The objective of the research is to link the relationship between water resources management and water borne diseases through the ecological approach which includes climate, human habitation, agricultural practices, sanitation and waste disposal. The relationship will be established through investigating at the household level, in the community and as reflected in policy and programs. It is also to understand the conventional wisdom, traditional methods (for instance *ahar pyne*), classical techniques as well as the conflict or amalgamation of technologies for managing water resources. It is also important to capture the everyday politics or struggle around the water resources and treatment seeking. The study area for the research is Gaya and Vaishali districts of Bihar.

With the above mentioned objectives, I am doing this household survey. And the details provided by you will be used for academic purposes. If there is any sensitive information, the researcher will consider the principle of confidentiality and stick to the research ethics.

You (the respondent) have understood the objectives of the research and providing the information in all your capabilities and providing your consent for research.

| Signature (resp.) |  |
| --- | --- |

| Consent (code)* |  |
| --- | --- |

| Witness Signature |  |
| --- | --- |

| Questionnaire No. |  | **Household Survey** | Survey Date |  |
| --- | --- | --- | --- | --- |
| State | Bihar | Data Entry Date |  |

| **[A] description and identification of the sample household** | | | | | |
| --- | --- | --- | --- | --- | --- |
| S.N. | Item | Response/code | S.N. | Item | Response/code |
| 1 | Tehsil/Block/Town |  | 6 | Sample Household No. |  |
| 2 | Panchayat |  | 7 | Name of the informant |  |
| 3 | Village |  | 8 | Sr. No. of Informant¤ |  |
| 4 | Ward No./Hamlet |  | 9 | Head of the household |  |
| 5 | GIS code for HH |  | 10 | Survey Code |  |
| 11 | Reason for Substitute (*if survey code is 2 in item 10*) |  | | | |

**Code for Block A**

***Item No. 10: Survey Code****: Original – 1, Substitute – 2*

| **[B] household characteristics** | | | | | | |
| --- | --- | --- | --- | --- | --- | --- |
| S.N | Item | Response/Code | S.N | Item | Response/Code | |
| 1 | Household size |  | 9 | Primary source of income |  | |
| 2 | Type of the house (code) |  | 10 | Secondary source of income |  | |
| 3 | Religion (code) |  | **facilities in the household*** | | Available | Govt. |
| 4 | Social group (code) |  | 11 | Drinking water |  |  |
| 5 | Sub-group (if apply) |  | 12 | Electrification |  |  |
| 6 | Land possession on the date of  survey (code) |  | 13 | Sanitation |  |  |
| 7 | Use of the land possessed |  | 14 | LPG connection |  |  |
| 8 | Income of the family (monthly) |  | 15 | Ration card |  |  |
| 16 | Geo-physical location of the HH  (*mention w.r.t.village ecology*) |  | | | | |

*¤ as mentioned in block H*

**Code of Block B**

***Item: 2 Type of the house:*** *kachcha house-1, pakka house-2, semi pakka house-3*

***Item: 3Religion****: Hinduism-1, Islam-2, Sikhism-3, Jainism-4, Christianity-5, Budhism-6, Other-9*

***Item: 4 Social group:*** *Schedule Castes- 1, Schedule Tribes- 2, Extremely Backward Classes- 3, Backward Classes-4, Others- 9*

***Item: 6 Land possession:*** *No land- 1, less than 0.5 acre- 1, 0.5 acre to 2 acre- 3, 2 acre to 5 acre- 4, More than 5 acre- 5*

***Item: 9 & 10 primary source of the income & secondary source of income:***  *self employed/bussiness-1, employed in private sector-2, government services-3, farming-4, labour-5, agricultural labour-6, domestic work-7, pension-8, others-9*

**In the response section of the Available and Government for item no. 11 to 15 mention Yes-1, No-2 and not known-3*

| **[C] health and disease related information of the household** | | | | | | | | | | | |
| --- | --- | --- | --- | --- | --- | --- | --- | --- | --- | --- | --- |
| S.N | Item | Response/code | | | | S.N. | Item | Response/code | | | |
| 1 | What are common health issues in the household? |  | | | | 11 | What was the home remedy |  | | | |
| 2 | Are there any water borne diseases within one month* |  | | | | 12 | *(if 1 in col.2)* was it typhoid |  | | | |
| 3 | *(if 1 in previous col.)* what are they |  | | | | 13 | *(if 1 in col.2)* was it jaundice |  | | | |
| **S.N. of the member(s) in block H** | |  |  |  |  | **S.N. of the member(s) in block C** | |  |  |  |  |
| 4 | *(if diarrheal diseases in col. 3)* type of diarrheal disease (code) |  |  |  |  | 14 | *(if 1 in col.2 & 2 in clo. 3)* was/is it chronic arsenicosis* |  |  |  |  |
| 5 | Month of the ailment |  |  |  |  | 15 | Manifestation (code) |  |  |  |  |
| 6 | Number of days he/she suffered |  |  |  |  | 16 | Organ affected (code) |  |  |  |  |
| 7 | Did he/she seek treatment* |  |  |  |  | 17 | Type of arsenicosis (code) |  |  |  |  |
| 8 | *(if 1 in previous col.)* from where s/he seek treatment (code) |  |  |  |  | 18 | Did he/she seek treatment* |  |  |  |  |
| 9 | Did s/he take ORS* |  |  |  |  | 19 | From where s/he seek treatment (code) |  |  |  |  |
| 10 | Any home remedy* |  |  |  |  | 20 | Since when manifestation is |  |  |  |  |
| 21 | *(If 1 in col. 2 & 2 in col. 3, 12, 13 &14)* other water-borne diseases (name) |  | | | | | | | | | |

**Code for Block C**

***Item: 4 type of diarrheal diseases:*** *acute diarrhea-1, persistent diarrhea-2, dysentery (bloody diarrhoea)-3*

***Item: 8 & 19 from where he/she seek treatment:*** *local doctor without medical training-1,rural medical practitioner (RMP-2, private clinic/hospital-3, PHC-4, CHC-5, district hospital-6, other-9*

***Item: 15 manifestation:*** *common manifestation-1, rare manifestation-2*

***Item: 16 organ affected:*** *palm-1, sole-2, lower limb-3, upper limb-4, face-5, trunk-6, other-9*

***Item: 17 type of arsenicosis:*** *keratosis-1, melanois-2, skin pigmentation-3, cancer-4, other-9*

** write yes-1, no-2, not known-3 wherever it apply*

| **[D] water borne disease and understanding of the people** | |
| --- | --- |
| 1. | What do you think are the reasons of diarrheal diseases in your household? |
| 2 | What do you think are the reasons of arsenicosis? |
| 3 | What are the struggles you face for the treatment of water borne diseases? |
| 4 | How you manage to get treatment? |
| 5. | What is your opinion to deal with water-borne diseases in your locality |

| **[E] water and it’s management at the household level** | | | | | | |
| --- | --- | --- | --- | --- | --- | --- |
| S.N | Item | Response/code | S.N. | Item | | Response/code |
| **drinking water** | | | 21 | | How water is taken out (code) |  |
| 1 | Principal source of drinking water (code) |  | 22 | *(If 1 in item 1 &2):* depth of the hand-pump/tube-well (code) | |  |
| 2 | Ownership of the source (code) |  | 23 | Number of hand-pump in the household | |  |
| 3 | Quality of the water (code) |  | 24 | *(If 4, 5 in item 1 & 1 in item 2):*  Do you clean the well?* | |  |
| 4 | Distance of the source (code) |  | 25 | *(If 1 in previous)* how often(code) | |  |
| 5 | Who fetch the water (code) |  | **water for other purposes (cooking, bathing, washing)** | | | |
| 6 | Is the available water enough for the year* |  | 26 | Are the source of drinking and other purposes same?* | |  |
| 7 | *(if 2 in item 6)* required quantity for the household |  | 27 | *(if 2 in item 26)* source for other purposes *(same as item 1)* | |  |
| 8 | *(if 2 in item 6)* month in which water is insufficient |  | 28 | *(If 3 in item 1, 10 & 27):*  frequency of water (code) | |  |
| 9 | *(If 2 in item 6)* do you go for supplementary source* |  | 29 | Is it metered?* | |  |
| 10 | *(If 1 in item 9)* Supplementary source of drinking water *(same code as item 1)* |  | 30 | Amount paid per month | |  |
| 11 | Reason for the going supplementary source |  | 31 | Whether bathroom, latrine and kitchen is connected to water* | |  |
| 12 | Is there stagnant water around the water sources* |  | 32 | How far is bathroom and latrine from the water source (code) | |  |
| 13 | Which source has stagnant water around (code) |  | 33 | How clean is surrounding of the water source (code) | |  |
| 14 | Do you purify/treat the water* |  | **possession of other/natural water body** | | | |
| 15 | *(if 1 in item 14)* method of the purification/ treatment (code) |  | 34 | do the HH posses other source* | |  |
| 17 | Do you store the water for drinking purposes* |  | 35 | type of water resource (code) | |  |
| 18 | *(if 1 in item 17)* container for storing the water (code) |  | 36 | use of the water resources or natural water body (code) | |  |
| 19 | Is the container covered* |  | 37 | Catchment area (code) | |  |
| 20 | How long the water stored in the container (code) |  | 38 | Any comments: | | |

**Code for block E**

***Item: 1, 10 & 27 principal source of drinking water/ supplementary source/ source for the other purposes:*** *hand-pump/tube-well-1, public tap/ stand pipe-2, piped water-3, protected well-4, unprotected well-5, bottled water-6, tanker truck public-7, tanker truck private-8, surface water (pond, tank, river etc)- 10, hand-pump connected to electric motor-11, summersible-12, other source- 9*

***Item: 2 ownership:*** *own by the HH-1, Own by relatives-2, owned by neighbour but not relative-3, community-4, government-5, non-government organization-6, other-9*

***Item: 3 quality of the water:*** *odour in the water-1, visible pollutant in the water-2, chemical pollutant in the water-3, not good in taste-4, not fit to drink-5*

***Item: 4 & 32 distance of the source/ how far is bathroom and latrine from the water source:*** *less than 100 meter-1, between 100 meter to 500 meter-2, 500meter to 1 km-3, more than 1 km-4*

***Item: 5 who fetch the water:*** *female below 18 years-1, male below 18 years-2, adult female-3, adult male-4, servent-5, other-9*

***Item: 13 which source has stagnant water around:*** *primary source-1, supplementary/secondary source-2*

***Item: 15 methods of the purification/treatment:*** *boiling-1, purifier-2, chemically treated with bleach or chlorine tablet-3, filter with cloth-4, using sand filtration-5, traditional method-6, other-9*

***Item: 18 containers for storing the water:*** *earthen pot-1, plastic container-2, iron container-3, brass-4, stainless steel-5, other metal/other container-9*

***Item: 20 how long the water stored in the container:*** *less than 12 hour-1, less than 1 day (24 hours)- 2, more than 1 day but less than 2days-3, more than 2 days-4*

***Item: 21 how water is taken out:*** *through tap-1, vessel with handle-2, vessel without handle-3, poured out-4*

***Item: 22 depth of the hand-pump/tube-well:*** *less than 100 ft-1, between 100 ft to 125 ft-2, between 125 to 150 ft-3, between 150 ft to 175 ft- 4, more than 175 ft- 5*

***Item: 25 how often:*** *every month-1, once in six month-2, once in a year-3, not fixed but clean in 2-3 years- 4*

***Item: 28 frequency of water:*** *24 hours-1, once in days-2, twice in a day-3, more than two times in a day-4, once in two days-5, once in a week- 6*

***Item: 33 how clean is surrounding of the water source:*** *unhygienic-1, moderately hygienic-2, clean and hygienic-3*

***Item: 35 type of water resource:*** *water tank-1, ahar-pyne-2, small pond-3, big pond-4*

***Item: 36 use of the water resources or natural water body:*** *not in use-1, use for fisheries-2, use for irrigation-3, use for water based crops (makhana, pan etc)-4, use for other purposes-9*

***Item: 37 catchment area:*** *in less than 1 acre-1, in between 1 to 2 acre of land-2, more than 2 acre of land-3*

** write yes-1, no-2, not known-3 wherever it apply*

| **[F] sanitation, waste management and micro-environment of the household** | | | | | | | | |
| --- | --- | --- | --- | --- | --- | --- | --- | --- |
| s.n. | item | response | | | | s.n. | item | response |
| 1 | whether HH has latrine* |  | | | | 14 | *(if 1 in col. 13)* time period of the stagnant water (code) |  |
| 2 | type of latrine (code) |  | | | | 15 | system to dispose the waste water (code) |  |
| 3 | where the latrine is located (code) |  | | | | 16 | system to dispose garbage (code) |  |
| 4 | *(If 1 in col. 1)* is there anyone not using the latrine* |  | | | | 17 | how frequently the garbage is disposed (code) |  |
| 5 | *(if 1 in col.4)* srl. no. of the member not using latrine *(as mentioned in block H)* |  |  |  |  | 18 | Existence of animal/poultry farm* |  |
| 6 | (*If 2 in col.1)* where the member(s) go(es) for (code) |  | | | | 19 | *(if 1 in col.18 )* is it in the household premise* |  |
| 7 | whether the HH members regularly wash the hands before meal* |  | | | | 20 | disposal of animal excreta (code) |  |
| 8 | whether the HH members regularly wash the hands after defecation* |  | | | | 21 | Whether the household faces problem of flies and mosquitoes* |  |
| 9 | whether the excreta from the septic tank/pit/composting latrine ever been emptied* |  | | | | 22 | dealing with the flies and mosquitoes (code) |  |
| 10 | Place of disposal of the excreta last time (code) |  | | | | 23 | Whether the human faeces is visible around the HH* |  |
| 11 | Disposal of faeces for the children below 3 years of age (code) |  | | | | 24 | Whether HH directly experienced the flood during last 2-3 years* |  |
| 12 | Drainage system of the HH* |  | | | | 25 | Which year(s)? |  |
| 13 | Whether the HH faces problem of stagnant water in and around the household premises* |  | | | | 26 | approach to main road (code) |  |

**Code for block F**

***Item: 2 type of latrine:*** *pit latrine with slab-1, pit latrine without slab-2, composting latrine-3, piped sewer system-4, septic tank-5, twin leach pit-6, single pit-7, others-9*

***Item: 3 where the latrine located:*** *within in household-1, outside the household premise but within 50 metre-2, outside the household premise but more 50 metre- 3*

***Item: 6 where the member(s) go(es) for:*** *public toilet-1, community latrine run by NGO, truts etc-2, open defecation- 3, neighbours toilets-4*

***Item: 10 place of disposal of the excreta last time:*** *open land/field-1, disposed in water bodies (pond, tank/river)-2, buried into covered pit-3, treatment plant-4, not known-5, other- 9*

***Item: 11 disposal of faeces for the children below 3 years of age:*** *children use latrine-1, put/rinsed into latrine-2, put/rinsed into drain/ditch-3, thrown into garbage-4, thrown or left into open area-5, buried into the land-6, not applicable-7, others-9*

***Item: 14 time period of the stagnant water:*** *for week-1, for a month-2, more than a month but not throughout a year-3, throughout year-4, only in rainy season-5*

***Item: 15 system to dispose the waste water:*** *use after treatment-1, disposed off into wherever possible after treatment-2, without treatment: disposed off in the drainage-3, disposed off in the open land/area-4, disposed off in the street-5, disposed off in to the pond/river/nalla-6, other-9*

***Item: 16 & 20 system to dispose the garbage/disposal of animal excreta:*** *dispose to bio-gas plant or manure pit-1, disposed to the dumping spot owned by the household-2, community dumping spot-3, open area/street/drain-4, other-9*

***Item: 17 how frequently the garbage is disposed:*** *once in a everyday-1, twice in a day-2, once in two days-3, once in three days-4, once in week-5, once in month-6*

***Item: 22 dealing with the flies and mosquitoes:*** *living with the condition without any attempt to deal with-1, use of mosquito net-2, use of mosquito repellent (liquid, lotion or coil)-3, burn straw in the household-4, other-9*

***Item: 26 approach to main road:*** *direct open to the main road-1, through lane/street without light-2, through lane/street with light-3, not connected to main road by any constructed lane/path/street-4*

| **[G] water management an it’s understanding of the people** | |
| --- | --- |
| 1. | What kind of effort is being made in your village to manage the water resources? |
| 2 | What was the source of water for the household earlier? When did it change? What has been the impact |
| 3 | How is the village water and sanitation committe working? |
| 4 | What kind of chemical fertilizers you use for your farm? |
| 5. | How you manage water requirements for your crop? |
| 6 | Why is necessary to save water? |

| **[H] demographic details of the household** | | | | | | | | | | | | |
| --- | --- | --- | --- | --- | --- | --- | --- | --- | --- | --- | --- | --- |
| s.n | name | relation with head of the household (code) | gender (code) | age (code) | marital status (code) | education (code) | primary occupation (code) | health issue (if any name it) | anyone hospitalized | reason for hospitalization | any premature delivery | any other information |
| 1 | 2 | 3 | 4 | 5 | 6 | 7 | 8 | 9 | 10 | 11 | 12 | 13 |
|  |  |  |  |  |  |  |  |  |  |  |  |  |
|  |  |  |  |  |  |  |  |  |  |  |  |  |
|  |  |  |  |  |  |  |  |  |  |  |  |  |
|  |  |  |  |  |  |  |  |  |  |  |  |  |
|  |  |  |  |  |  |  |  |  |  |  |  |  |
|  |  |  |  |  |  |  |  |  |  |  |  |  |
|  |  |  |  |  |  |  |  |  |  |  |  |  |
|  |  |  |  |  |  |  |  |  |  |  |  |  |
|  |  |  |  |  |  |  |  |  |  |  |  |  |
|  |  |  |  |  |  |  |  |  |  |  |  |  |
|  |  |  |  |  |  |  |  |  |  |  |  |  |

**Code for block H**

***Colum: 3 relation to head:*** *self-1, wife-2, son-3, daughter-4, brother/sister-in-laws-5, mother/father-in-laws-6, other relative-9*

***Column: 4 gender:*** *male-1, female-2, transgender-3*

***Column: 6 marital status:*** *unmarried-1, married-2, divorce/separated-3*

***Column: 7 education:*** *not literate-1, literate without schooling/with non-formal education system-2, literate with formal school: below primary-3, primary-4, upper primary-5, secondary-6, higher secondary-7, graduation-8, post graduation and above-8*

***Column:8: primary occupation:*** *unemployed-1, self employed-2, employed in private sector-3, employed in government services-4, farming-5,migrant labour-6, agricultural labour-7, domestic work-8, unpaid family work-10, others-9*

**write yes-1, no-2, not known-3 wherever it apply*

*******

email id: [asrarhj@gmail.com](mailto:asrarhj@gmail.com) contact on +91-9650759585

1. The statement of the consent along with the research objectives will be read out to the informant(s) and consent will be taken orally or written, whichever participants will be comfortable.

   *code for consent: oral-1, written-2 [↑](#footnote-ref-1)
